# Supplementary material for: Site- and Time-Dependent Compositional Shifts in Oral Microbiota Communities
Source: Front Oral Health. 2022 Mar 1;3:826996. doi: 10.3389/froh.2022.826996 (PMC8921071; doi:10.3389/froh.2022.826996)
Supplement: Supplementary file 1 [file Table_1.XLSX]

## Sheet: Supplementary Table 1 
Supplementary Table 1. DNA concentrations of the biofilm and saliva samples collected from the 6 study participants after 1, 2, or 3 days of accumulation time. Numbers given indicate ng/µl. All samples were adjusted to 0.5 ng/µl before amplification of the target V3-V4 region of the 16S rRNA gene and 10 ng were used for each sequencing reaction.
					95%CI
Sample	Participant	Day	mean	median	low	high	min	max
Tooth biofilm	1	1	2.02	1.86	1.40	2.65	0.56	5.43
		2	3.58	3.49	2.64	4.52	1.10	6.63
		3	5.50	4.94	4.04	6.95	1.97	12.1
	2	1	3.27	3.07	2.31	4.23	1.33	8.84
		2	4.53	4.12	3.13	5.93	2.05	11.2
		3	3.15	2.87	2.42	3.88	1.21	5.56
	3	1	5.18	4.40	2.87	7.49	0.60	16.0
		2	6.44	4.83	4.12	8.77	2.12	17.2
		3	8.68	9.22	6.69	10.7	3.17	17.9
	4	1	6.76	6.72	4.76	8.76	1.87	13.0
		2	10.4	8.30	6.29	14.5	2.82	29.9
		3	10.5	6.06	5.49	15.6	3.03	34.1
	5	1	6.62	5.28	4.23	9.01	1.68	14.3
		2	3.50	3.18	2.40	4.59	0.56	7.95
		3	11.25	8.51	5.65	16.9	3.58	45.2
	6	1	4.09	2.30	2.15	6.04	0.69	12.4
		2	7.63	6.97	5.03	10.2	2.26	21.0
		3	7.55	5.22	4.85	10.3	2.11	15.9
Saliva	all	1	24.1	19.5	2.02	46.2	9.20	65.8
		2	25.3	17.2	2.22	48.4	9.48	69.0
		3	32.9	15.8	-1.82	67.6	7.20	82.6

## Sheet: Supplementary Table 2
Supplementary Table 2. Linear discriminant analysis (LDA) effect size (LEfSe) analyse is applied for high-dimensional class comparisons between anterior and posterior sections of the tooth arches by accumulation time point, as well as in accumulation time-stratified data. Log10 LDA-scores and p-values from non-parametric Kruskall Wallis testing are shown.
Phyla differentiating between anterior and posterior regions of the mouth in at least two accumulation time points. No statistically significant difference was found.
Phylum	Class	Order	Family	Genus	Species	Enriched	LDA-score (Log-10) day1	LDA-score (Log-10) day2	LDA-score (Log-10) day3	P-value
Bacteroidetes	Flavobacteriia	Flavobacteriales	Flavobacteriaceae	Bergeyella	Bergeyella sp. HMT322	Anterior	3.8	3.8	3.5
Actinobacteria	Actinobacteria	Corynebacteriales	Corynebacteriaceae	Corynebacterium	Corynebacterium durum	Anterior	3.4	3.2	3.2
Bacteroidetes	Bacteroidia	Bacteroidales	Porphyromonadaceae	Porphyromonas	Porphyromonas sp. HMT930	Anterior	3.3	2.6	2.7
Firmicutes	Negativicutes	Veillonellales	Veillonellaceae	Veillonella	Veillonella sp. HMT780	Anterior	3.1	2.7	2.8
Bacteroidetes	Flavobacteriia	Flavobacteriales	Flavobacteriaceae	Bergeyella		Anterior	3.8	3.8	3.5
Proteobacteria	Betaproteobacteria	Neisseriales	Neisseriaceae	Neisseria		Anterior	4.6	4.5	4.2
Proteobacteria	Betaproteobacteria	Neisseriales	Neisseriaceae			Anterior	4.6	4.5	4.3
Proteobacteria	Betaproteobacteria	Neisseriales				Anterior	4.6	4.5	4.3
Proteobacteria	Betaproteobacteria					Anterior	4.6	4.6	4.4
Proteobacteria						Anterior	4.8	4.7	4.5
Actinobacteria	Actinobacteria	Actinomycetales	Actinomycetaceae	Actinomyces	Actinomyces oris	Posterior	3.9	3.8	3.7
Proteobacteria	Gammaproteobacteria	Pasteurellales	Pasteurellaceae	Aggregatibacter	Aggregatibacter sp. HMT458	Posterior	3.2	3.2	3.4
Actinobacteria	Coriobacteriia	Coriobacteriales	Coriobacteriaceae	Atopobium	Atopobium parvulum	Posterior	4.1	2.5	2.6
Proteobacteria	Epsilonproteobacteria	Campylobacterales	Campylobacteraceae	Campylobacter	Campylobacter gracilis	Posterior	3.1	2.7	2.9
Bacteroidetes	Flavobacteriia	Flavobacteriales	Flavobacteriaceae	Capnocytophaga	Capnocytophaga sp. HMT864	Posterior	3.2	2.5	2.6
Fusobacteria	Fusobacteriia	Fusobacteriales	Leptotrichiaceae	Leptotrichia	Leptotrichia hongkongensis	Posterior	3.2	3.5	3.7
Actinobacteria	Actinobacteria	Actinomycetales	Actinomycetaceae	Peptidiphaga	Peptidiphaga sp. HMT183	Posterior	3.2	2.5	2.7
Firmicutes	Negativicutes	Selenomonadales	Selenomonadaceae	Selenomonas	Selenomonas noxia	Posterior	3.1	2.6	2.6
Firmicutes	Clostridia	Clostridiales	Lachnospiraceae XIV	Stomatobaculum	Stomatobaculum sp. HMT097	Posterior	3.6	2.7	2.8
Firmicutes	Bacilli	Lactobacillales	Streptococcaceae	Streptococcus	Streptococcus gordonii	Posterior	4.0	4.2	4.3
Firmicutes	Negativicutes	Veillonellales	Veillonellaceae	Veillonella	Veillonella dispar	Posterior	4.4	4.2	4.2
Firmicutes	Negativicutes	Veillonellales	Veillonellaceae	Veillonella	Veillonella parvula	Posterior	4.0	3.8	4.0
Actinobacteria	Actinobacteria	Actinomycetales	Actinomycetaceae	Actinomyces		Posterior	4.1	4.0	4.0
Actinobacteria	Actinobacteria	Actinomycetales	Actinomycetaceae	Peptidiphaga		Posterior	3.2	2.7	2.6
Firmicutes	Clostridia	Clostridiales	Lachnospiraceae XIV	Stomatobaculum		Posterior	3.5	2.7	2.8
Firmicutes	Negativicutes	Veillonellales	Veillonellaceae	Veillonella		Posterior	4.6	4.3	4.4
Actinobacteria	Actinobacteria	Actinomycetales	Actinomycetaceae			Posterior	4.1	4.0	4.0
Firmicutes	Negativicutes	Veillonellales	Veillonellaceae			Posterior	4.6	4.3	4.4
Firmicutes	Negativicutes	Veillonellales				Posterior	4.6	4.3	4.4
Firmicutes	Negativicutes					Posterior	4.6	4.3	4.4
Firmicutes						Posterior	4.6	4.6	4.6
Actinobacteria	Actinobacteria	Actinomycetales	Micrococcaceae	Rothia	Rothia aeria	Anterior	3.8	3.5	ns
Firmicutes	Bacilli	Lactobacillales	Streptococcaceae	Streptococcus	Streptococcus sp. HMT056	Anterior	3.1	3.2	ns
Actinobacteria	Actinobacteria	Corynebacteriales	Corynebacteriaceae	Corynebacterium	Corynebacterium matruchotii	Posterior	3.5	3.4	ns
Fusobacteria	Fusobacteriia	Fusobacteriales	Fusobacteriaceae	Fusobacterium	Fusobacterium nucleatum subsp. vincentii	Posterior	3.2	2.7	ns
Fusobacteria	Fusobacteriia	Fusobacteriales	Leptotrichiaceae	Leptotrichia	Leptotrichia hofstadii	Posterior	3.3	3.0	ns
Actinobacteria	Actinobacteria	Actinomycetales	Actinomycetaceae	Peptidiphaga	Peptidiphaga gingivicola	Posterior	3.1	2.5	ns
Actinobacteria	Actinobacteria	Actinomycetales	Actinomycetaceae	Actinomyces	Actinomyces israelii	Anterior	3.5	ns	2.7
Proteobacteria	Betaproteobacteria	Neisseriales	Neisseriaceae	Kingella	Kingella denitrificans	Anterior	3.9	ns	2.8
Bacteroidetes	Flavobacteriia	Flavobacteriales	Flavobacteriaceae	Capnocytophaga	Capnocytophaga sp. HMT902	Posterior	3.2	ns	2.5
Proteobacteria	Betaproteobacteria	Neisseriales	Neisseriaceae	Kingella	Kingella oralis	Posterior	3.3	ns	3.6
Bacteroidetes	Bacteroidia	Bacteroidales	Prevotellaceae	Prevotella	Prevotella melaninogenica	Posterior	3.6	ns	3.7
Bacteroidetes	Bacteroidia	Bacteroidales	Prevotellaceae	Prevotella	Prevotella oris	Posterior	3.0	ns	2.4
Proteobacteria	Betaproteobacteria	Neisseriales	Neisseriaceae	Kingella		Posterior	3.3	ns	3.6
Fusobacteria	Fusobacteriia	Fusobacteriales	Leptotrichiaceae	Leptotrichia		Posterior	3.7	ns	4.0
Bacteroidetes	Bacteroidia	Bacteroidales	Prevotellaceae	Prevotella		Posterior	3.8	ns	3.6
Fusobacteria	Fusobacteriia	Fusobacteriales	Leptotrichiaceae			Posterior	3.7	ns	4.0
Day 1: accumulation time-stratified data
Actinobacteria	Actinobacteria	Actinomycetales	Actinomycetaceae	Actinomyces	Actinomyces israelii	Anterior	3.5			6.4E-03
Proteobacteria	Gammaproteobacteria	Pasteurellales	Pasteurellaceae	Aggregatibacter	Aggregatibactera phrophilus	Anterior	3.4			1.5E-02
Bacteroidetes	Flavobacteriia	Flavobacteriales	Flavobacteriaceae	Bergeyella	Bergeyella sp. HMT322	Anterior	3.8			1.5E-04
Bacteroidetes	Flavobacteriia	Flavobacteriales	Flavobacteriaceae	Capnocytophaga	Capnocytophaga sp. HMT332	Anterior	3.8			4.4E-02
Firmicutes	Clostridia	Clostridiales	Lachnospiraceae XIV	Catonella	Catonella sp. HMT164	Anterior	3.5			1.0E-02
Actinobacteria	Actinobacteria	Corynebacteriales	Corynebacteriaceae	Corynebacterium	Corynebacterium durum	Anterior	3.4			1.2E-03
Fusobacteria	Fusobacteriia	Fusobacteriales	Fusobacteriaceae	Fusobacterium	Fusobacterium hwasookii	Anterior	2.9			2.3E-02
Proteobacteria	Betaproteobacteria	Neisseriales	Neisseriaceae	Kingella	Kingella denitrificans	Anterior	3.9			1.1E-03
Bacteroidetes	Bacteroidia	Bacteroidales	Porphyromonadaceae	Porphyromonas	Porphyromonas sp. HMT930	Anterior	3.3			3.5E-02
Actinobacteria	Actinobacteria	Actinomycetales	Micrococcaceae	Rothia	Rothia aeria	Anterior	3.8			5.1E-03
Actinobacteria	Actinobacteria	Actinomycetales	Micrococcaceae	Rothia	Rothia mucilaginosa	Anterior	3.1			1.6E-02
Firmicutes	Bacilli	Lactobacillales	Streptococcaceae	Streptococcus	Streptococcus sp. HMT056	Anterior	3.1			7.3E-04
Firmicutes	Bacilli	Lactobacillales	Streptococcaceae	Streptococcus	Streptococcus sp. HMT074	Anterior	3.2			1.3E-02
Firmicutes	Negativicutes	Veillonellales	Veillonellaceae	Veillonella	Veillonella sp. HMT780	Anterior	3.1			2.4E-02
Bacteroidetes	Flavobacteriia	Flavobacteriales	Flavobacteriaceae	Bergeyella		Anterior	3.8			2.7E-04
Firmicutes	Clostridia	Clostridiales	Lachnospiraceae XIV	Catonella		Anterior	3.5			1.0E-02
Proteobacteria	Betaproteobacteria	Neisseriales	Neisseriaceae	Neisseria		Anterior	4.6			1.7E-02
Proteobacteria	Betaproteobacteria	Neisseriales	Neisseriaceae			Anterior	4.6			2.0E-02
Proteobacteria	Betaproteobacteria	Neisseriales				Anterior	4.6			2.0E-02
Proteobacteria	Betaproteobacteria					Anterior	4.6			2.5E-02
Proteobacteria						Anterior	4.8			1.8E-03
Actinobacteria	Actinobacteria	Actinomycetales	Actinomycetaceae	Actinomyces	Actinomycesoris	Posterior	3.9			1.1E-02
Proteobacteria	Gammaproteobacteria	Pasteurellales	Pasteurellaceae	Aggregatibacter	Aggregatibacter sp. HMT458	Posterior	3.2			4.9E-03
Actinobacteria	Coriobacteriia	Coriobacteriales	Coriobacteriaceae	Atopobium	Atopobiumparvulum	Posterior	4.1			3.6E-02
Proteobacteria	Epsilonproteobacteria	Campylobacterales	Campylobacteraceae	Campylobacter	Campylobactergracilis	Posterior	3.1			3.4E-03
Bacteroidetes	Flavobacteriia	Flavobacteriales	Flavobacteriaceae	Capnocytophaga	Capnocytophaga sp. HMT864	Posterior	3.2			7.7E-03
Bacteroidetes	Flavobacteriia	Flavobacteriales	Flavobacteriaceae	Capnocytophaga	Capnocytophaga sp. HMT902	Posterior	3.2			2.5E-02
Actinobacteria	Actinobacteria	Corynebacteriales	Corynebacteriaceae	Corynebacterium	Corynebacterium matruchotii	Posterior	3.5			3.3E-02
Fusobacteria	Fusobacteriia	Fusobacteriales	Fusobacteriaceae	Fusobacterium	Fusobacterium nucleatum subsp. vincentii	Posterior	3.2			1.8E-02
Proteobacteria	Betaproteobacteria	Neisseriales	Neisseriaceae	Kingella	Kingella oralis	Posterior	3.3			1.3E-02
Fusobacteria	Fusobacteriia	Fusobacteriales	Leptotrichiaceae	Leptotrichia	Leptotrichia hofstadii	Posterior	3.3			1.0E-02
Fusobacteria	Fusobacteriia	Fusobacteriales	Leptotrichiaceae	Leptotrichia	Leptotrichia hongkongensis	Posterior	3.2			6.9E-05
Actinobacteria	Actinobacteria	Actinomycetales	Actinomycetaceae	Peptidiphaga	Peptidiphaga gingivicola	Posterior	3.1			3.6E-02
Actinobacteria	Actinobacteria	Actinomycetales	Actinomycetaceae	Peptidiphaga	Peptidiphaga sp. HMT183	Posterior	3.2			3.3E-03
Bacteroidetes	Bacteroidia	Bacteroidales	Prevotellaceae	Prevotella	Prevotella denticola	Posterior	3.2			3.6E-02
Bacteroidetes	Bacteroidia	Bacteroidales	Prevotellaceae	Prevotella	Prevotella melaninogenica	Posterior	3.6			5.0E-03
Bacteroidetes	Bacteroidia	Bacteroidales	Prevotellaceae	Prevotella	Prevotella oris	Posterior	3.0			3.1E-02
Firmicutes	Negativicutes	Selenomonadales	Selenomonadaceae	Selenomonas	Selenomonas noxia	Posterior	3.1			1.3E-02
Firmicutes	Clostridia	Clostridiales	Lachnospiraceae XIV	Stomatobaculum	Stomatobaculum sp. HMT097	Posterior	3.6			8.4E-03
Firmicutes	Bacilli	Lactobacillales	Streptococcaceae	Streptococcus	Streptococcus gordonii	Posterior	4.0			2.7E-05
Firmicutes	Negativicutes	Veillonellales	Veillonellaceae	Veillonella	Veillonella dispar	Posterior	4.4			1.8E-05
Firmicutes	Negativicutes	Veillonellales	Veillonellaceae	Veillonella	Veillonella parvula	Posterior	4.0			3.8E-06
Firmicutes	Negativicutes	Veillonellales	Veillonellaceae	Veillonella	Veillonella rogosae	Posterior	3.2			1.7E-02
Actinobacteria	Actinobacteria	Actinomycetales	Actinomycetaceae	Actinomyces		Posterior	4.1			3.7E-03
Proteobacteria	Betaproteobacteria	Neisseriales	Neisseriaceae	Kingella		Posterior	3.3			1.7E-02
Fusobacteria	Fusobacteriia	Fusobacteriales	Leptotrichiaceae	Leptotrichia		Posterior	3.7			1.6E-02
Actinobacteria	Actinobacteria	Actinomycetales	Actinomycetaceae	Peptidiphaga		Posterior	3.2			1.7E-03
Bacteroidetes	Bacteroidia	Bacteroidales	Prevotellaceae	Prevotella		Posterior	3.8			8.9E-04
Firmicutes	Clostridia	Clostridiales	Lachnospiraceae XIV	Stomatobaculum		Posterior	3.5			8.4E-03
Firmicutes	Negativicutes	Veillonellales	Veillonellaceae	Veillonella		Posterior	4.6			1.2E-05
Actinobacteria	Actinobacteria	Actinomycetales	Actinomycetaceae			Posterior	4.1			2.1E-03
Fusobacteria	Fusobacteriia	Fusobacteriales	Leptotrichiaceae			Posterior	3.7			1.6E-02
Bacteroidetes	Bacteroidia	Bacteroidales	Prevotellaceae			Posterior	3.8			3.9E-02
Firmicutes	Negativicutes	Veillonellales	Veillonellaceae			Posterior	4.6			1.2E-05
Bacteroidetes	Bacteroidia	Bacteroidales				Posterior	4.2			1.6E-03
Firmicutes	Negativicutes	Veillonellales				Posterior	4.6			1.2E-05
Bacteroidetes	Bacteroidia					Posterior	4.2			1.6E-03
Firmicutes	Negativicutes					Posterior	4.6			1.2E-05
Firmicutes						Posterior	4.6			1.7E-03
Day 2: accumulation time-stratified data
Actinobacteria	Actinobacteria	Actinomycetales	Actinomycetaceae	Actinomyces	Actinomyces johnsonii	Anterior		2.9		4.4E-02
Proteobacteria	Gammaproteobacteria	Pasteurellales	Pasteurellaceae	Aggregatibacter	Aggregatibacter paraphrophilus	Anterior		3.4		2.1E-02
Bacteroidetes	Bacteroidia	Bacteroidales	Prevotellaceae	Alloprevotella	Alloprevotella sp. HMT473	Anterior		2.9		1.5E-04
Bacteroidetes	Bacteroidia	Bacteroidales	Prevotellaceae	Alloprevotella	Alloprevotella sp. HMT913	Anterior		2.9		1.9E-02
Bacteroidetes	Flavobacteriia	Flavobacteriales	Flavobacteriaceae	Bergeyella	Bergeyella sp. HMT322	Anterior		3.8		2.0E-02
Proteobacteria	Epsilonproteobacteria	Campylobacterales	Campylobacteraceae	Campylobacter	Campylobacter rectus	Anterior		2.4		2.1E-02
Bacteroidetes	Flavobacteriia	Flavobacteriales	Flavobacteriaceae	Capnocytophaga	Capnocytophaga leadbetteri	Anterior		3.8		8.0E-03
Actinobacteria	Actinobacteria	Corynebacteriales	Corynebacteriaceae	Corynebacterium	Corynebacterium durum	Anterior		3.2		5.0E-03
Fusobacteria	Fusobacteriia	Fusobacteriales	Fusobacteriaceae	Fusobacterium	Fusobacterium sp. HMT248	Anterior		3.2		4.4E-02
Proteobacteria	Gammaproteobacteria	Pasteurellales	Pasteurellaceae	Haemophilus	Haemophilus sp. HMT908	Anterior		2.8		4.4E-02
Firmicutes	Clostridia	Clostridiales	Lachnospiraceae XIV	Lachnospiraceae G2	Lachnospiraceae G2 bacterium HMT088	Anterior		2.5		4.4E-02
Bacteroidetes	Flavobacteriia	Flavobacteriales	Flavobacteriaceae	Peptostreptococcus	Peptostreptococcus stomatis	Anterior		3.2		4.4E-02
Bacteroidetes	Bacteroidia	Bacteroidales	Porphyromonadaceae	Porphyromonas	Porphyromonas catoniae	Anterior		3.3		2.7E-02
Bacteroidetes	Bacteroidia	Bacteroidales	Porphyromonadaceae	Porphyromonas	Porphyromonas endodontalis	Anterior		2.9		4.4E-02
Bacteroidetes	Bacteroidia	Bacteroidales	Porphyromonadaceae	Porphyromonas	Porphyromonas gingivalis	Anterior		2.8		1.3E-02
Bacteroidetes	Bacteroidia	Bacteroidales	Porphyromonadaceae	Porphyromonas	Porphyromonas sp. HMT930	Anterior		2.6		8.4E-04
Bacteroidetes	Bacteroidia	Bacteroidales	Prevotellaceae	Prevotella	Prevotella sp. HMT475	Anterior		2.9		4.4E-02
Actinobacteria	Actinobacteria	Actinomycetales	Micrococcaceae	Rothia	Rothia aeria	Anterior		3.5		3.5E-02
Saccharibacteria TM7	Saccharibacteria TM7 C1	Saccharibacteria TM7 O1	Saccharibacteria TM7 F1	Saccharibacteria TM7 G1	Saccharibacteria TM7 G1 bacterium HMT352	Anterior		2.7		1.5E-05
Saccharibacteria TM7	Saccharibacteria TM7 C1	Saccharibacteria TM7 O1	Saccharibacteria TM7 F1	Saccharibacteria TM7 G1	Saccharibacteria TM7 G1 bacterium HMT952	Anterior		2.5		8.0E-03
Actinobacteria	Actinobacteria	Actinomycetales	Actinomycetaceae	Actinomyces	Schaalia odontolyticus	Anterior		2.7		3.9E-02
Firmicutes	Negativicutes	Selenomonadales	Selenomonadaceae	Selenomonas	Selenomonas sp. HMT126	Anterior		2.8		4.4E-02
Firmicutes	Bacilli	Lactobacillales	Streptococcaceae	Streptococcus	Streptococcus sanguinis	Anterior		4.0		1.9E-02
Firmicutes	Bacilli	Lactobacillales	Streptococcaceae	Streptococcus	Streptococcus sp. HMT056	Anterior		3.2		2.1E-02
Firmicutes	Negativicutes	Veillonellales	Veillonellaceae	Veillonella	Veillonella sp. HMT780	Anterior		2.7		2.6E-05
Proteobacteria	Gammaproteobacteria	Pasteurellales	Pasteurellaceae	Aggregatibacter		Anterior		3.9		3.6E-02
Bacteroidetes	Bacteroidia	Bacteroidales	Prevotellaceae	Alloprevotella		Anterior		3.6		1.1E-04
Bacteroidetes	Flavobacteriia	Flavobacteriales	Flavobacteriaceae	Bergeyella		Anterior		3.8		3.2E-02
Firmicutes	Clostridia	Clostridiales	Lachnospiraceae XIV	Lachnospiraceae G2		Anterior		2.5		4.4E-02
Firmicutes	Bacilli	Lactobacillales	Lactobacillaceae	Lactobacillus		Anterior		2.8		4.4E-02
Proteobacteria	Betaproteobacteria	Neisseriales	Neisseriaceae	Neisseria		Anterior		4.5		1.2E-02
Bacteroidetes	Flavobacteriia	Flavobacteriales	Flavobacteriaceae	Peptostreptococcus		Anterior		3.2		4.4E-02
Firmicutes	Bacilli	Lactobacillales	Lactobacillaceae			Anterior		2.8		4.4E-02
Proteobacteria	Betaproteobacteria	Neisseriales	Neisseriaceae			Anterior		4.5		4.4E-04
Firmicutes	Clostridia	Clostridiales	Ruminococcaceae			Anterior		2.4		3.3E-02
Proteobacteria	Betaproteobacteria	Neisseriales				Anterior		4.5		4.4E-04
Proteobacteria	Betaproteobacteria					Anterior		4.6		6.3E-04
Proteobacteria						Anterior		4.7		6.7E-06
Absconditabacteria SR1	Absconditabacteria SR1 C1	Absconditabacteria SR1 O1	Absconditabacteria SR1 F1	Absconditabacteria SR1 G1	Absconditabacteria SR1 G1 bacterium HMT875	Posterior		2.4		4.2E-02
Actinobacteria	Actinobacteria	Actinomycetales	Actinomycetaceae	Actinomyces	Actinomyces oris	Posterior		3.8		4.3E-03
Actinobacteria	Actinobacteria	Actinomycetales	Actinomycetaceae	Actinomyces	Actinomyces sp. HMT171	Posterior		3.1		1.1E-02
Proteobacteria	Gammaproteobacteria	Pasteurellales	Pasteurellaceae	Aggregatibacter	Aggregatibacter sp. HMT458	Posterior		3.2		5.5E-03
Actinobacteria	Coriobacteriia	Coriobacteriales	Coriobacteriaceae	Atopobium	Atopobium parvulum	Posterior		2.5		1.7E-02
Bacteroidetes	Flavobacteriia	Flavobacteriales	Flavobacteriaceae	Bergeyella	Bergeyella sp. HMT900	Posterior		2.5		3.6E-02
Proteobacteria	Epsilonproteobacteria	Campylobacterales	Campylobacteraceae	Campylobacter	Campylobacter concisus	Posterior		2.6		3.6E-02
Proteobacteria	Epsilonproteobacteria	Campylobacterales	Campylobacteraceae	Campylobacter	Campylobacter gracilis	Posterior		2.7		8.3E-05
Bacteroidetes	Flavobacteriia	Flavobacteriales	Flavobacteriaceae	Capnocytophaga	Capnocytophaga sp. HMT336	Posterior		2.8		3.3E-04
Bacteroidetes	Flavobacteriia	Flavobacteriales	Flavobacteriaceae	Capnocytophaga	Capnocytophaga sp. HMT338	Posterior		2.8		3.6E-02
Bacteroidetes	Flavobacteriia	Flavobacteriales	Flavobacteriaceae	Capnocytophaga	Capnocytophaga sp. HMT864	Posterior		2.5		4.5E-02
Bacteroidetes	Flavobacteriia	Flavobacteriales	Flavobacteriaceae	Capnocytophaga	Capnocytophaga sp. HMT903	Posterior		2.7		3.7E-03
Proteobacteria	Gammaproteobacteria	Cardiobacteriales	Cardiobacteriaceae	Cardiobacterium	Cardiobacterium valvarum	Posterior		2.7		2.7E-02
Actinobacteria	Actinobacteria	Corynebacteriales	Corynebacteriaceae	Corynebacterium	Corynebacterium matruchotii	Posterior		3.4		3.4E-03
Fusobacteria	Fusobacteriia	Fusobacteriales	Fusobacteriaceae	Fusobacterium	Fusobacterium nucleatum subsp. animalis	Posterior		2.7		1.7E-02
Fusobacteria	Fusobacteriia	Fusobacteriales	Fusobacteriaceae	Fusobacterium	Fusobacterium nucleatum subsp. vincentii	Posterior		2.7		1.7E-02
Firmicutes	Bacilli	Bacillales	Gemellaceae	Gemella	Gemella sanguinis	Posterior		2.8		3.2E-02
Firmicutes	Clostridia	Clostridiales	Lachnospiraceae XIV	Lachnoanaerobaculum	Lachnoanaero baculumsaburreum	Posterior		2.4		2.5E-02
Fusobacteria	Fusobacteriia	Fusobacteriales	Leptotrichiaceae	Leptotrichia	Leptotrichia goodfellowii	Posterior		2.6		9.9E-03
Fusobacteria	Fusobacteriia	Fusobacteriales	Leptotrichiaceae	Leptotrichia	Leptotrichia hofstadii	Posterior		3.0		1.5E-02
Fusobacteria	Fusobacteriia	Fusobacteriales	Leptotrichiaceae	Leptotrichia	Leptotrichia hongkongensis	Posterior		3.5		1.2E-04
Fusobacteria	Fusobacteriia	Fusobacteriales	Leptotrichiaceae	Leptotrichia	Leptotrichia sp. HMT215	Posterior		3.0		2.1E-02
Fusobacteria	Fusobacteriia	Fusobacteriales	Leptotrichiaceae	Leptotrichia	Leptotrichia sp. HMT221	Posterior		2.4		1.7E-02
Proteobacteria	Betaproteobacteria	Neisseriales	Neisseriaceae	Neisseria	Neisseria oralis	Posterior		2.8		4.4E-02
Actinobacteria	Actinobacteria	Actinomycetales	Actinomycetaceae	Peptidiphaga	Peptidiphaga gingivicola	Posterior		2.5		3.6E-02
Actinobacteria	Actinobacteria	Actinomycetales	Actinomycetaceae	Peptidiphaga	Peptidiphaga sp. HMT183	Posterior		2.5		1.1E-04
Bacteroidetes	Bacteroidia	Bacteroidales	Prevotellaceae	Prevotella	Prevotella sp. HMT317	Posterior		2.7		2.5E-02
Saccharibacteria TM7	Saccharibacteria TM7 C1	Saccharibacteria TM7 O1	Saccharibacteria TM7 F1	Saccharibacteria TM7 G1	Saccharibacteria TM7 G1 bacterium HMT348	Posterior		2.7		1.2E-02
Firmicutes	Negativicutes	Selenomonadales	Selenomonadaceae	Selenomonas	Selenomonasnoxia	Posterior		2.6		1.2E-02
Firmicutes	Clostridia	Clostridiales	Lachnospiraceae XIV	Stomatobaculum	Stomatobaculum sp. HMT097	Posterior		2.7		1.8E-06
Firmicutes	Bacilli	Lactobacillales	Streptococcaceae	Streptococcus	Streptococcusgordonii	Posterior		4.2		1.0E-05
Firmicutes	Bacilli	Lactobacillales	Streptococcaceae	Streptococcus	Streptococcusmitis	Posterior		4.1		3.9E-02
Firmicutes	Negativicutes	Veillonellales	Veillonellaceae	Veillonella	Veillonelladispar	Posterior		4.2		5.0E-03
Firmicutes	Negativicutes	Veillonellales	Veillonellaceae	Veillonella	Veillonellaparvula	Posterior		3.8		2.7E-03
Actinobacteria	Actinobacteria	Actinomycetales	Actinomycetaceae	Actinomyces		Posterior		4.0		5.4E-03
Actinobacteria	Actinobacteria	Actinomycetales	Actinomycetaceae	Peptidiphaga		Posterior		2.7		6.8E-05
Firmicutes	Clostridia	Clostridiales	Lachnospiraceae XIV	Stomatobaculum		Posterior		2.7		9.7E-07
Firmicutes	Bacilli	Lactobacillales	Streptococcaceae	Streptococcus		Posterior		4.3		1.9E-02
Firmicutes	Negativicutes	Veillonellales	Veillonellaceae	Veillonella		Posterior		4.3		9.0E-04
Actinobacteria	Actinobacteria	Actinomycetales	Actinomycetaceae			Posterior		4.0		3.7E-03
Firmicutes	Bacilli	Lactobacillales	Streptococcaceae			Posterior		4.3		1.9E-02
Firmicutes	Negativicutes	Veillonellales	Veillonellaceae			Posterior		4.3		9.0E-04
Actinobacteria	Actinobacteria	Actinomycetales				Posterior		4.1		2.4E-02
Firmicutes	Negativicutes	Veillonellales				Posterior		4.3		9.0E-04
Actinobacteria	Actinobacteria					Posterior		4.1		1.2E-02
Firmicutes	Negativicutes					Posterior		4.3		7.6E-04
Firmicutes						Posterior		4.6		2.8E-03
Actinobacteria						Posterior		4.1		1.2E-02
Day 3: accumulation time-stratified data
Actinobacteria	Actinobacteria	Actinomycetales	Actinomycetaceae	Actinomyces	Actinomyces israelii	Anterior			2.7	2.0E-02
Actinobacteria	Actinobacteria	Actinomycetales	Actinomycetaceae	Actinomyces	Actinomyces johnsonii	Anterior			2.5	4.4E-02
Proteobacteria	Gammaproteobacteria	Pasteurellales	Pasteurellaceae	Aggregatibacter	Aggregatibacter paraphrophilus	Anterior			3.2	5.8E-04
Bacteroidetes	Bacteroidia	Bacteroidales	Prevotellaceae	Alloprevotella	Alloprevotella sp. HMT473	Anterior			3.1	2.5E-03
Bacteroidetes	Flavobacteriia	Flavobacteriales	Flavobacteriaceae	Bergeyella	Bergeyella sp. HMT322	Anterior			3.5	2.4E-02
Bacteroidetes	Flavobacteriia	Flavobacteriales	Flavobacteriaceae	Capnocytophaga	Capnocytophaga leadbetteri	Anterior			4.0	7.7E-03
Actinobacteria	Actinobacteria	Corynebacteriales	Corynebacteriaceae	Corynebacterium	Corynebacterium durum	Anterior			3.2	2.0E-02
Proteobacteria	Betaproteobacteria	Neisseriales	Neisseriaceae	Kingella	Kingella denitrificans	Anterior			2.8	4.9E-02
Proteobacteria	Betaproteobacteria	Neisseriales	Neisseriaceae	Kingella	Kingella oralis	Anterior			3.6	1.9E-02
Firmicutes	Clostridia	Clostridiales	Lachnospiraceae XIV	Lachnospiraceae G2	Lachnospiraceae G2 bacterium HMT088	Anterior			2.6	2.0E-02
Proteobacteria	Betaproteobacteria	Neisseriales	Neisseriaceae	Neisseria	Neisseriaelongata	Anterior			3.7	1.5E-02
Firmicutes	Clostridia	Clostridiales	Peptostreptococcaceae XI	Peptostreptococcaceae XI G1	Peptostreptococcaceae XI G1 Eubacterium infirmum	Anterior			2.7	4.4E-02
Bacteroidetes	Bacteroidia	Bacteroidales	Porphyromonadaceae	Porphyromonas	Porphyromonas catoniae	Anterior			3.7	3.2E-02
Bacteroidetes	Bacteroidia	Bacteroidales	Porphyromonadaceae	Porphyromonas	Porphyromonas endodontalis	Anterior			2.6	2.1E-02
Bacteroidetes	Bacteroidia	Bacteroidales	Porphyromonadaceae	Porphyromonas	Porphyromonas gingivalis	Anterior			3.2	3.9E-03
Bacteroidetes	Bacteroidia	Bacteroidales	Porphyromonadaceae	Porphyromonas	Porphyromonas sp.HMT930	Anterior			2.7	7.5E-03
Bacteroidetes	Bacteroidia	Bacteroidales	Prevotellaceae	Prevotella	Prevotella shahii	Anterior			2.6	4.4E-02
Bacteroidetes	Bacteroidia	Bacteroidales	Prevotellaceae	Prevotella	Prevotella sp. HMT475	Anterior			2.7	7.4E-03
Saccharibacteria TM7	Saccharibacteria TM7 C1	Saccharibacteria TM7 O1	Saccharibacteria TM7 F1	Saccharibacteria TM7 G1	Saccharibacteria TM7 G1 bacterium HMT349	Anterior			3.0	4.4E-02
Saccharibacteria TM7	Saccharibacteria TM7 C1	Saccharibacteria TM7 O1	Saccharibacteria TM7 F1	Saccharibacteria TM7 G1	Saccharibacteria TM7 G1 bacterium HMT952	Anterior			3.1	2.7E-03
Firmicutes	Negativicutes	Selenomonadales	Selenomonadaceae	Selenomonas	Selenomonas sp. HMT481	Anterior			2.3	1.3E-02
Firmicutes	Negativicutes	Selenomonadales	Selenomonadaceae	Selenomonas	Selenomonas sp. HMT892	Anterior			2.6	3.9E-04
Firmicutes	Erysipelotrichia	Erysipelotrichales	Erysipelotrichaceae	Solobacterium	Solobacterium moorei	Anterior			2.3	1.3E-02
Firmicutes	Bacilli	Lactobacillales	Streptococcaceae	Streptococcus	Streptococcus sanguinis	Anterior			3.9	8.3E-03
Spirochaetes	Spirochaetia	Spirochaetales	Spirochaetaceae	Treponema	Treponema pectinovorum	Anterior			3.2	4.4E-02
Firmicutes	Negativicutes	Veillonellales	Veillonellaceae	Veillonella	Veillonella sp. HMT780	Anterior			2.8	1.8E-02
Proteobacteria	Gammaproteobacteria	Pasteurellales	Pasteurellaceae	Aggregatibacter		Anterior			3.7	2.2E-02
Bacteroidetes	Bacteroidia	Bacteroidales	Prevotellaceae	Alloprevotella		Anterior			3.7	2.8E-04
Bacteroidetes	Flavobacteriia	Flavobacteriales	Flavobacteriaceae	Bergeyella		Anterior			3.5	4.9E-02
Proteobacteria	Betaproteobacteria	Neisseriales	Neisseriaceae	Kingella		Anterior			3.6	2.1E-02
Firmicutes	Clostridia	Clostridiales	Lachnospiraceae XIV	Lachnospiraceae G2		Anterior			2.7	2.0E-02
Proteobacteria	Betaproteobacteria	Neisseriales	Neisseriaceae	Neisseria		Anterior			4.2	4.5E-02
Firmicutes	Clostridia	Clostridiales	Peptostreptococcaceae XI	Peptostreptococcaceae XI G1		Anterior			2.8	4.4E-02
Firmicutes	Erysipelotrichia	Erysipelotrichales	Erysipelotrichaceae	Solobacterium		Anterior			2.4	1.3E-02
Firmicutes	Erysipelotrichia	Erysipelotrichales	Erysipelotrichaceae			Anterior			2.3	1.3E-02
Proteobacteria	Betaproteobacteria	Neisseriales	Neisseriaceae			Anterior			4.3	3.8E-02
Firmicutes	Erysipelotrichia	Erysipelotrichales				Anterior			2.3	1.3E-02
Proteobacteria	Betaproteobacteria	Neisseriales				Anterior			4.3	3.8E-02
Proteobacteria	Betaproteobacteria					Anterior			4.4	3.1E-02
Firmicutes	Erysipelotrichia					Anterior			2.3	1.3E-02
Proteobacteria						Anterior			4.5	2.0E-04
Actinobacteria	Actinobacteria	Actinomycetales	Actinomycetaceae	Actinomyces	Actinomyces oris	Posterior			3.7	2.3E-02
Proteobacteria	Gammaproteobacteria	Pasteurellales	Pasteurellaceae	Aggregatibacter	Aggregatibacter sp. HMT458	Posterior			3.4	2.4E-02
Actinobacteria	Coriobacteriia	Coriobacteriales	Coriobacteriaceae	Atopobium	Atopobium parvulum	Posterior			2.6	2.3E-02
Proteobacteria	Epsilonproteobacteria	Campylobacterales	Campylobacteraceae	Campylobacter	Campylobacter gracilis	Posterior			2.9	1.7E-04
Bacteroidetes	Flavobacteriia	Flavobacteriales	Flavobacteriaceae	Capnocytophaga	Capnocytophaga haemolytica	Posterior			2.6	3.6E-02
Bacteroidetes	Flavobacteriia	Flavobacteriales	Flavobacteriaceae	Capnocytophaga	Capnocytophaga sp. HMT326	Posterior			2.5	2.6E-02
Bacteroidetes	Flavobacteriia	Flavobacteriales	Flavobacteriaceae	Capnocytophaga	Capnocytophaga sp. HMT336	Posterior			2.6	4.9E-02
Bacteroidetes	Flavobacteriia	Flavobacteriales	Flavobacteriaceae	Capnocytophaga	Capnocytophaga sp. HMT864	Posterior			2.6	4.6E-02
Bacteroidetes	Flavobacteriia	Flavobacteriales	Flavobacteriaceae	Capnocytophaga	Capnocytophaga sp. HMT902	Posterior			2.5	3.6E-02
Fusobacteria	Fusobacteriia	Fusobacteriales	Fusobacteriaceae	Fusobacterium	Fusobacterium nucleatum subsp. animalis	Posterior			2.9	1.2E-02
Firmicutes	Clostridia	Clostridiales	Lachnospiraceae XIV	Lachnoanaerobaculum	Lachnoanaerobaculum saburreum	Posterior			2.6	2.5E-02
Fusobacteria	Fusobacteriia	Fusobacteriales	Leptotrichiaceae	Leptotrichia	Leptotrichia hongkongensis	Posterior			3.7	1.3E-03
Fusobacteria	Fusobacteriia	Fusobacteriales	Leptotrichiaceae	Leptotrichia	Leptotrichia sp. HMT215	Posterior			3.3	1.5E-04
Actinobacteria	Actinobacteria	Actinomycetales	Actinomycetaceae	Peptidiphaga	Peptidiphaga sp. HMT183	Posterior			2.7	1.6E-03
Bacteroidetes	Bacteroidia	Bacteroidales	Prevotellaceae	Prevotella	Prevotella histicola	Posterior			2.8	1.2E-02
Bacteroidetes	Bacteroidia	Bacteroidales	Prevotellaceae	Prevotella	Prevotella melaninogenica	Posterior			3.7	2.2E-02
Bacteroidetes	Bacteroidia	Bacteroidales	Prevotellaceae	Prevotella	Prevotella oris	Posterior			2.4	2.4E-02
Firmicutes	Negativicutes	Selenomonadales	Selenomonadaceae	Selenomonas	Selenomonas noxia	Posterior			2.6	4.8E-02
Firmicutes	Clostridia	Clostridiales	Lachnospiraceae XIV	Stomatobaculum	Stomatobaculum longum	Posterior			2.5	3.6E-02
Firmicutes	Clostridia	Clostridiales	Lachnospiraceae XIV	Stomatobaculum	Stomatobaculum sp. HMT097	Posterior			2.8	3.0E-03
Firmicutes	Bacilli	Lactobacillales	Streptococcaceae	Streptococcus	Streptococcus gordonii	Posterior			4.3	7.6E-07
Firmicutes	Negativicutes	Veillonellales	Veillonellaceae	Veillonella	Veillonella dispar	Posterior			4.2	9.2E-03
Firmicutes	Negativicutes	Veillonellales	Veillonellaceae	Veillonella	Veillonella parvula	Posterior			4.0	1.2E-05
Actinobacteria	Actinobacteria	Actinomycetales	Actinomycetaceae	Actinomyces		Posterior			4.0	3.6E-03
Fusobacteria	Fusobacteriia	Fusobacteriales	Leptotrichiaceae	Leptotrichia		Posterior			4.0	3.4E-03
Actinobacteria	Actinobacteria	Actinomycetales	Actinomycetaceae	Peptidiphaga		Posterior			2.6	5.7E-04
Bacteroidetes	Bacteroidia	Bacteroidales	Prevotellaceae	Prevotella		Posterior			3.6	3.2E-02
Firmicutes	Clostridia	Clostridiales	Lachnospiraceae XIV	Stomatobaculum		Posterior			2.8	2.9E-04
Firmicutes	Bacilli	Lactobacillales	Streptococcaceae	Streptococcus		Posterior			4.2	4.5E-02
Firmicutes	Negativicutes	Veillonellales	Veillonellaceae	Veillonella		Posterior			4.4	8.2E-04
Actinobacteria	Actinobacteria	Actinomycetales	Actinomycetaceae			Posterior			4.0	2.7E-03
Fusobacteria	Fusobacteriia	Fusobacteriales	Leptotrichiaceae			Posterior			4.0	3.4E-03
Firmicutes	Bacilli	Lactobacillales	Streptococcaceae			Posterior			4.2	4.5E-02
Firmicutes	Negativicutes	Veillonellales	Veillonellaceae			Posterior			4.4	9.0E-04
Actinobacteria	Actinobacteria	Actinomycetales				Posterior			4.0	1.4E-02
Firmicutes	Negativicutes	Veillonellales				Posterior			4.4	9.0E-04
Actinobacteria	Actinobacteria					Posterior			4.0	2.3E-02
Firmicutes	Negativicutes					Posterior			4.4	2.3E-03
Actinobacteria						Posterior			4.0	2.2E-02
Firmicutes						Posterior			4.6	8.6E-04

## Sheet: Supplementary Table 3
Supplementary Table 3. Explanatory (R2) and predictive (Q2) values from accumulation time-stratified multivariate OPLS-DA models contrasting the microbiotas at the posterior and anterior parts of the tooth arches. The models yielded similar results regardless of accumulation time.
OPLS-DA model of anterior versus posterior tooth arch positions
	Days	R2	Q2	P-value
OPLS-DA model	day1-3	0.44	0.25	2.9E-24
	day1	0.30	0.16	0.064
	day2	0.25	0.13	0.00099
	day3	0.30	0.21	0.0075

## Sheet: Supplementary Table 4
Supplementary Table 4. Linear discriminant analysis Effect Size (LEfSe) analysis used to identify phylogenetic differences associated with tooth biofilm maturation after 1, 2, or 3 days without oral hygiene. Log10 LDA scores >2.0 and p-values from non-parametric Kruskal Wallis testing are shown.
Phylum	Class	Order	Family	Genus	Species	Enriched on day	LDA (log10)	P-value
					Bergeyella sp.HMT322	1	3.6	5.2E-07
					Granulicatella adiacens	1	3.9	1.9E-09
					Rothia dentocariosa	1	4.4	1.6E-03
					Streptococcus mitis	1	4.7	4.8E-16
				Bergeyella		1	3.6	1.9E-06
				Granulicatella		1	3.9	8.0E-10
				Rothia		1	4.5	8.6E-05
				Streptococcus		1	4.8	1.9E-17
			Carnobacteriaceae			1	3.9	8.0E-10
			Micrococcaceae			1	4.5	8.6E-05
			Streptococcaceae			1	4.8	1.9E-17
		Lactobacillales				1	4.8	9.5E-16
	Bacilli					1	4.8	2.0E-16
Firmicutes						1	4.7	7.0E-11
					Abiotrophiadefectiva	3	3.7	8.3E-08
					Absconditabacteria SR1 [G1] bacterium HMT874	3	3.1	2.3E-12
					Campylobacter rectus	3	2.9	3.5E-09
					Capnocytophaga gingivalis	3	4.1	6.7E-10
					Capnocytophaga granulosa	3	3.2	4.3E-05
					Capnocytophaga leadbetteri	3	4.0	1.4E-10
					Capnocytophaga sputigena	3	4.4	2.5E-20
					Eikenellac orrodens	3	2.9	1.7E-10
					Fusobacterium hwasookii	3	3.8	4.8E-07
					Fusobacterium nucleatum subsp. polymorphum	3	4.1	3.8E-10
					Lachnospiraceae G3 bacterium HMT100	3	2.9	2.2E-10
					Leptotrichia sp. HMT212	3	3.7	2.8E-13
					Leptotrichia sp. HMT225	3	3.2	1.2E-05
					Prevotella loescheii	3	2.6	3.1E-04
					Prevotella sp. HMT472	3	2.9	6.6E-05
					Ruminococcaceae G2 bacterium HMT085	3	3.1	5.4E-13
					Saccharibacteria TM7 G1 bacterium HMT352	3	2.5	1.1E-06
					Saccharibacteria TM7 G3 bacterium HMT351	3	2.8	4.6E-06
					Stomatobaculum longum	3	2.0	4.2E-03
					Streptococcus gordonii	3	3.8	3.2E-05
					Tannerella sp. HMT286	3	2.9	2.0E-06
				Abiotrophia		3	3.7	8.3E-08
				Absconditabacteria SR1 G1		3	3.2	3.1E-10
				Campylobacter		3	3.1	4.8E-08
				Capnocytophaga		3	4.7	3.5E-23
				Eikenella		3	2.9	1.7E-10
				Fusobacterium		3	4.4	1.7E-11
				Lachnospiraceae G 3		3	2.9	2.2E-10
				Leptotrichia		3	4.2	3.0E-16
				Ruminococcaceae G 2		3	3.1	5.4E-13
				Saccharibacteria TM7 G 3		3	2.9	4.6E-06
				Tannerella		3	2.9	9.8E-06
			Absconditabacteria SR1 F 1			3	3.2	3.1E-10
			Aerococcaceae			3	3.7	8.3E-08
			Campylobacteraceae			3	3.1	4.8E-08
			Flavobacteriaceae			3	4.6	1.4E-20
			Fusobacteriaceae			3	4.4	1.7E-11
			Lachnospiraceae XIV			3	3.5	2.2E-20
			Leptotrichiaceae			3	4.2	3.0E-16
			Ruminococcaceae			3	2.9	4.6E-17
			Saccharibacteria TM7 F1			3	3.3	3.1E-05
		Absconditabacteria SR1 O1				3	3.2	3.1E-10
		Campylobacterales				3	3.1	4.8E-08
		Clostridiales				3	3.6	5.8E-19
		Flavobacteriales				3	4.6	1.4E-20
		Fusobacteriales				3	4.5	6.3E-15
		Saccharibacteria TM7 O1				3	3.3	3.1E-05
	Absconditabacteria SR1 C1					3	3.2	3.1E-10
	Clostridia					3	3.6	5.8E-19
	Epsilonproteobacteria					3	3.1	4.8E-08
	Flavobacteriia					3	4.6	1.4E-20
	Fusobacteriia					3	4.5	6.3E-15
	Saccharibacteria TM7 C1					3	3.3	3.1E-05
Absconditabacteria SR1						3	3.2	3.1E-10
Bacteroidetes						3	4.7	8.6E-20
Fusobacteria						3	4.5	6.3E-15
Saccharibacteria TM7						3	3.3	3.1E-05
